# Supplementary material
Source: publisher site journal article supplement (https://www.dovepress.com/get_supplementary_file.php?f=476305.docx)
Supplement: Supplementary file 1 [file get_supplementary_file.php]

**Table S1 Top 10 countries/areas in terms of publications contribution**

| Rank | Country | Documents | TC | ACC | TLS |
| --- | --- | --- | --- | --- | --- |
| 1 | United States of America | 624 | 17244 | 27.6 | 495 |
| 2 | German | 304 | 6643 | 21.9 | 321 |
| 3 | China | 227 | 9776 | 43.1 | 73 |
| 4 | Italy | 207 | 5542 | 26.8 | 345 |
| 5 | France | 187 | 12403 | 66.3 | 338 |
| 6 | United Kingdom | 115 | 3855 | 33.5 | 288 |
| 7 | Canada | 113 | 9692 | 85.8 | 281 |
| 8 | Australia | 82 | 3874 | 47.2 | 270 |
| 9 | South Korea | 73 | 660 | 9.0 | 26 |
| 10 | Netherlands | 55 | 2626 | 47.8 | 206 |

**Abbreviations:** TC: Total Citation Count; ACC: Average Article Citation Count; TLS: Total Link Strength

**Table S2 Top 10 Active Authors and Co-cited Authors in the Research Field**

| Authors | Count | Centrality | Rank | Co-cited authors | Count | Centrality |
| --- | --- | --- | --- | --- | --- | --- |
| Brodie, Daniel | 62 | 0.07 | 1 | Combes, Alain | 606 | 0.02 |
| Combes, Alain | 62 | 0.11 | 2 | Schmidt, Matthieu | 588 | 0.05 |
| Schmidt, Matthieu | 48 | 0.09 | 3 | Giles J.Peek | 578 | 0.02 |
| Fan, Eddy | 43 | 0.04 | 4 | Vito Marco Ranieri | 441 | 0.01 |
| Pesenti, Antonio | 27 | 0.07 | 5 | Luciano Gattinoni | 350 | 0.03 |
| Abrams, Darryl | 22 | 0.03 | 6 | Ryan P Barbaro | 320 | 0.05 |
| Lebreton, Guillaume | 22 | 0.01 | 7 | Claude Guérin | 292 | 0.02 |
| Grasselli, Giacomo | 20 | 0.01 | 8 | Roy G Brower | 291 | 0.01 |
| Lorusso, Roberto | 19 | 0.07 | 9 | DAVIES A | 256 | 0.00 |
| Guervilly, Christophe | 17 | 0.03 | 10 | Giacomo Bellani | 255 | 0.00 |

**Table S3 Keywords in the top 15 rankings**

| Rank | keywords | Count | Centrality |
| --- | --- | --- | --- |
| 1 | extracorporeal membrane oxygenation | 962 | 0.00 |
| 2 | acute respiratory distress syndrome | 601 | 0.00 |
| 3 | respiratory distress syndrome | 349 | 0.02 |
| 4 | mechanical ventilation | 281 | 0.03 |
| 5 | failure | 279 | 0.02 |
| 6 | life support | 266 | 0.02 |
| 7 | mortality | 251 | 0.02 |
| 8 | acute lung injury | 221 | 0.02 |
| 9 | ARDS | 221 | 0.01 |
| 10 | ECMO | 214 | 0.05 |
| 11 | support | 200 | 0.03 |
| 12 | respiratory failure | 159 | 0.01 |
| 13 | outcome | 154 | 0.02 |
| 14 | survival | 132 | 0.01 |
| 15 | management | 113 | 0.05 |

**Abbreviations:** ARDS: Acute Respiratory Distress Syndrome; ECMO: Extracorporeal Membrane Oxygenation


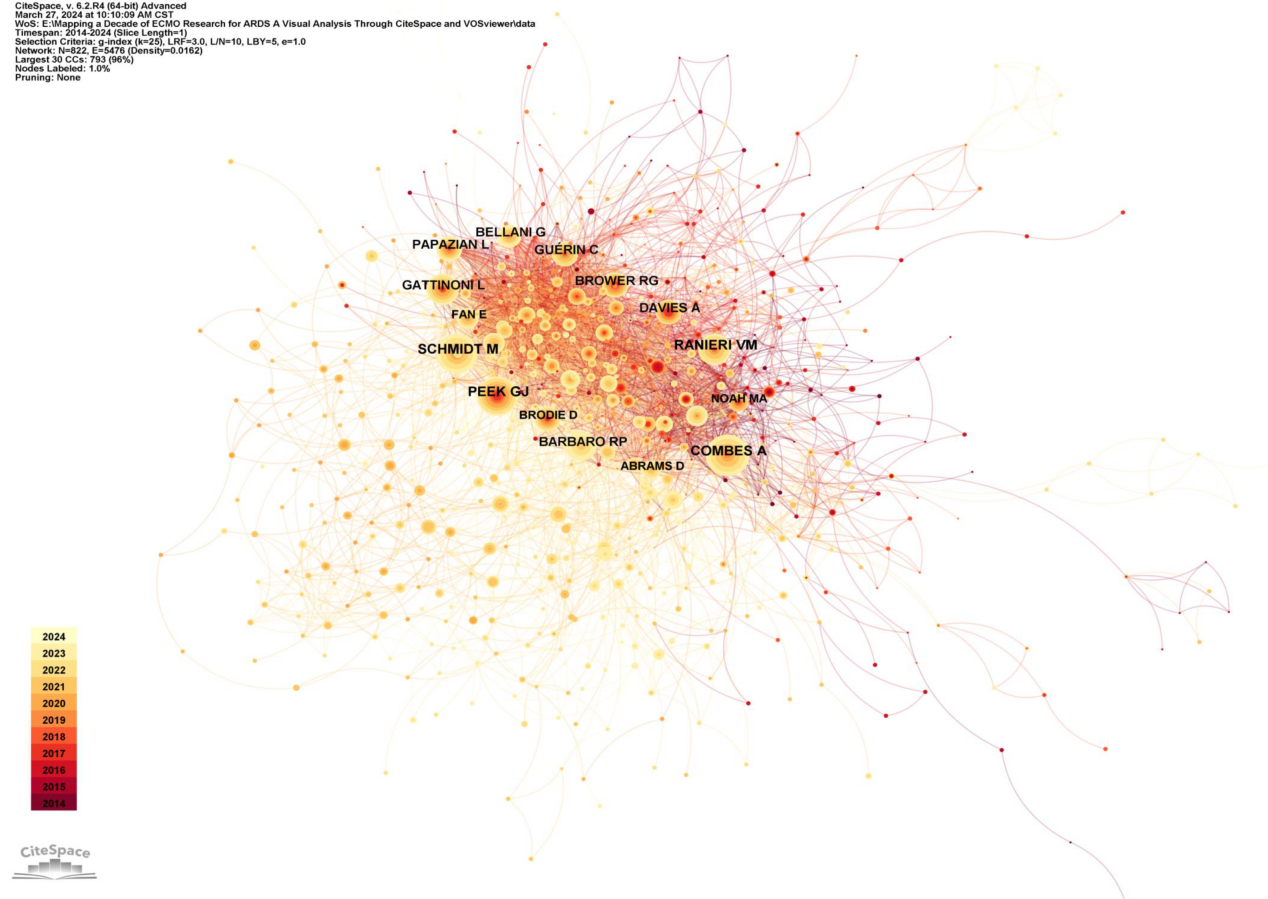


**Figure S1** depicts the network of co-cited authors.

**Notes:** Each node in the graph represents a co-cited author. The size of a point represents how many times that author has been co-cited.
